# Supplementary figures and images for: Coffee Consumption and Risk of Hypertension in Adults: Systematic Review and Meta-Analysis
Source: MDPI journal article supplement (doi:10.3390/nu15133060), 2023-07-07

A

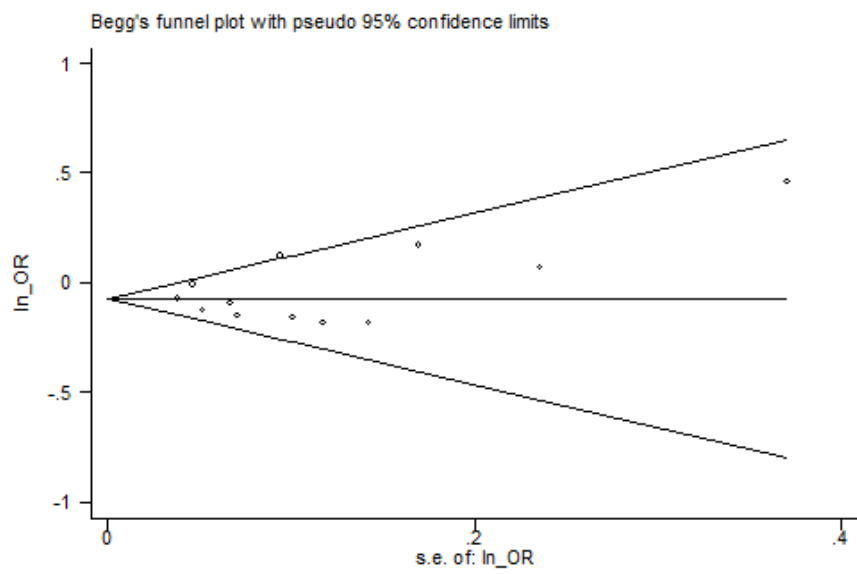

B

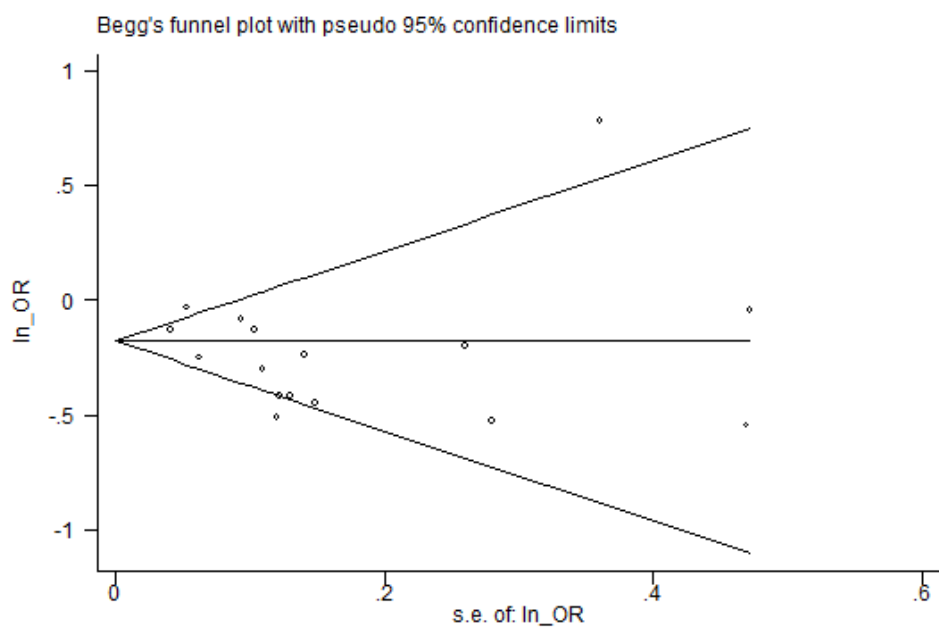

Supplementary Figure S1. Funnel plots for cohort studies (A) and cross-sectional studies (B).

Supplement: s1 [file s1]
